# Supplementary material for: Colloidal few layered graphene–tannic acid preserves the biocompatibility of periodontal ligament cells
Source: publisher site journal article supplement (doi:10.3762/bjnano.16.51), 2025-05-20
Supplement: Additional file 1 [file 2190-4286-16-51-S1.pdf]

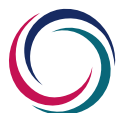

## Supporting Information

for

### **Colloidal few layered graphene–tannic acid preserves the biocompatibility of periodontal ligament cells**

Teissir Ben Ammar, Naji Kharouf, Dominique Vautier, Housseinou Ba, Nivedita Sudheer, Philippe Lavalie and Vincent Ball

*Beilstein J. Nanotechnol.* **2025**, *16*, 664–677. doi:10.3762/bjnano.16.51

## Additional figures and tables

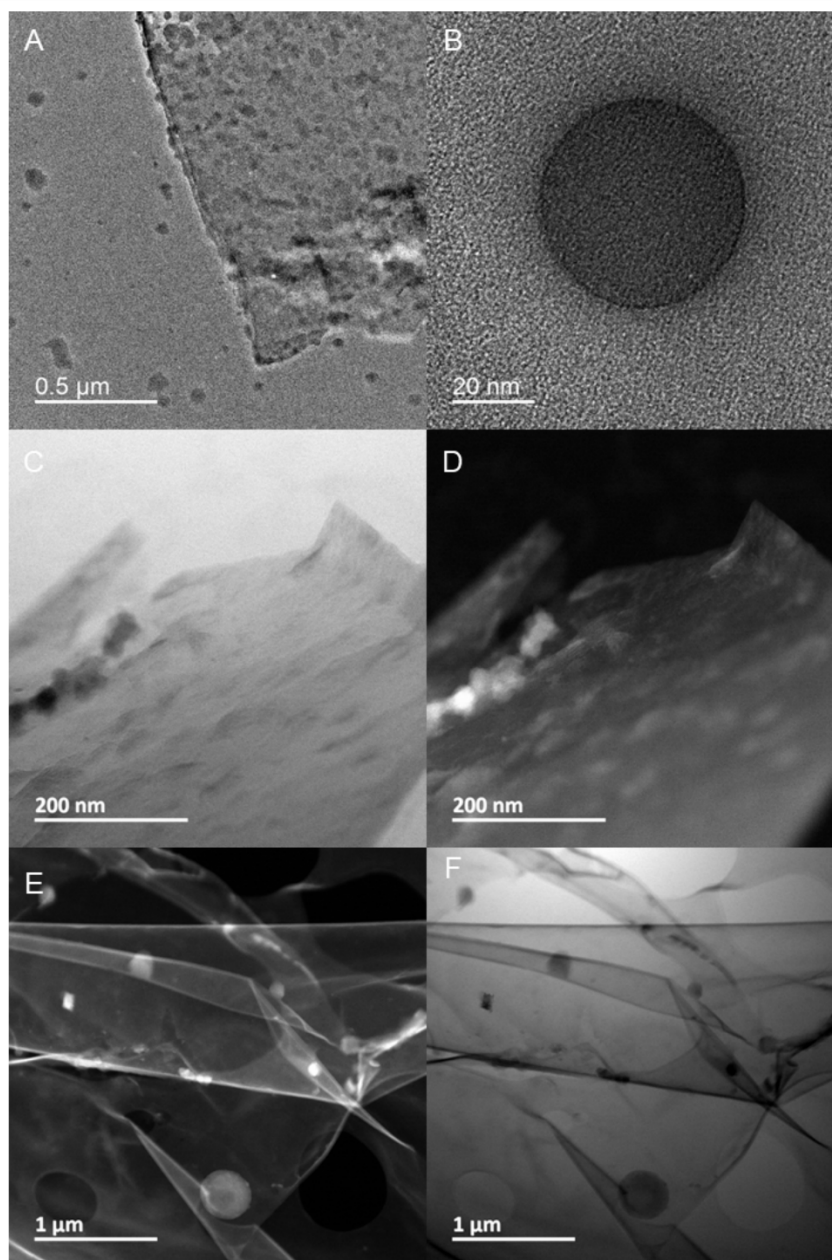

**Figure S1:** Representative transmission electron microscopy (TEM) micrographs of FLG layers obtained after liquid-phase exfoliation of graphite assisted by TA (A). Structure of spherical granules present on top of layers (B). BF-STEM (C, F) and DF-STEM (D, E) images of FLG sheets and particle distribution on the surface. BF: bright field; DF:dark field.

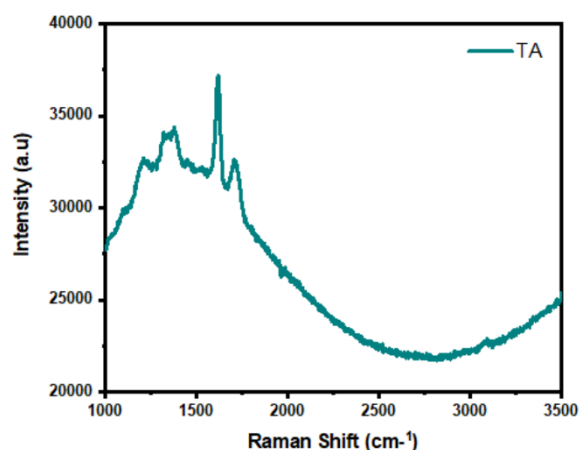

**Figure S2:** Raman spectrum of tannic acid.

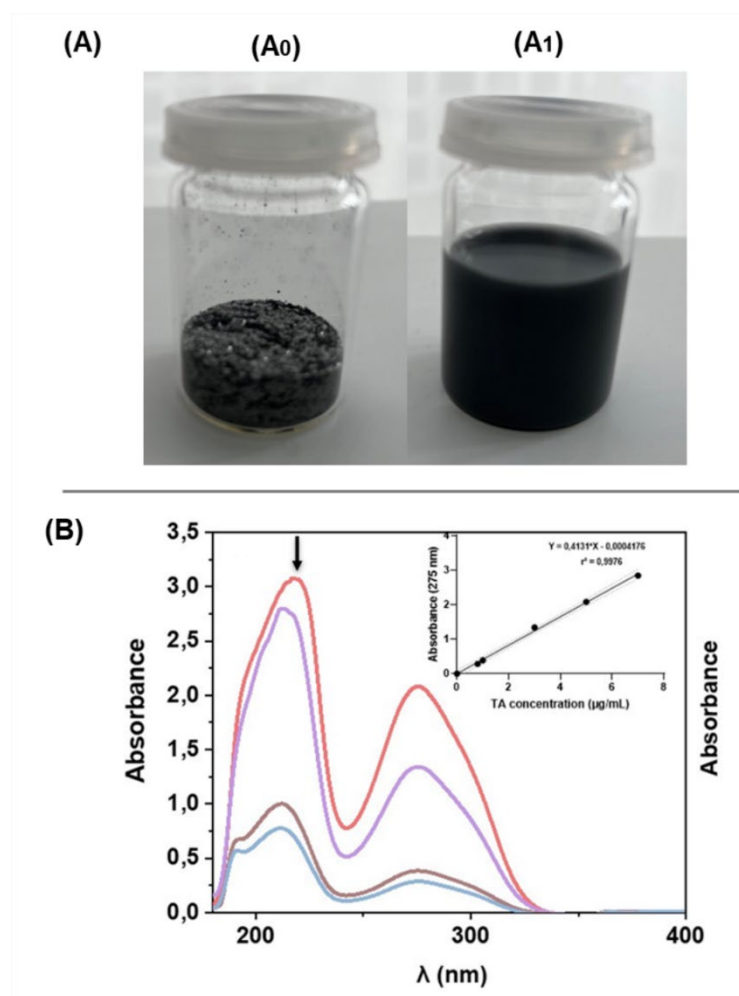

**Figure S3:** Picture of the initial graphite (A0) and FLG–TA colloid after ultrasonication and sedimentation (A1). UV–visible spectra of TA with different concentrations ( $0\text{--}8\ \mu\text{g}\cdot\text{mL}^{-1}$ ) in the wavelength range of  $180\text{--}400\ \text{nm}$ . The inset represents the linear calibration curve between the concentrations of TA and the absorbance at  $274\ \text{nm}$  (B).

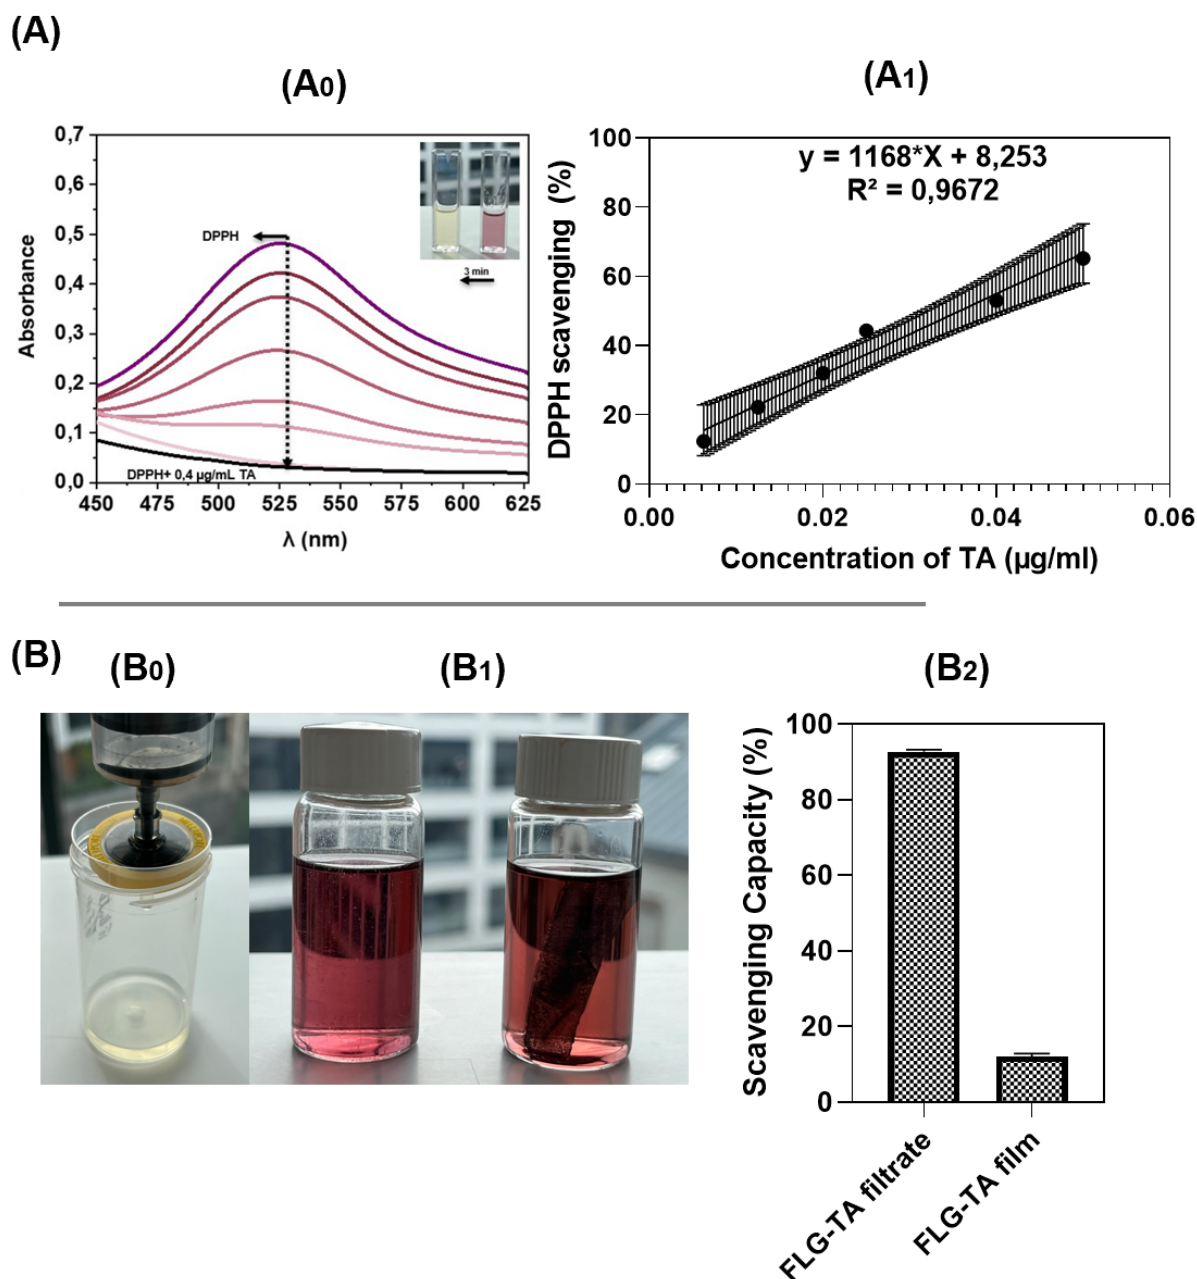

**Figure S4:** Determination of TA's ability to scavenge stable DPPH free radicals by monitoring the intensity of the DPPH radical absorption peak at 517 nm (A0). Calibration curve between TA concentrations ( $\mu\text{g}\cdot\text{mL}^{-1}$ ) and respective DPPH scavenging capacity (%) at 517 nm (A1). Pictures showing the DPPH scavenging capacity of FLG-TA filtrate (B0) and FLG-TA film (B1), and their respective experimental DPPH scavenging capacities (%) (B2).

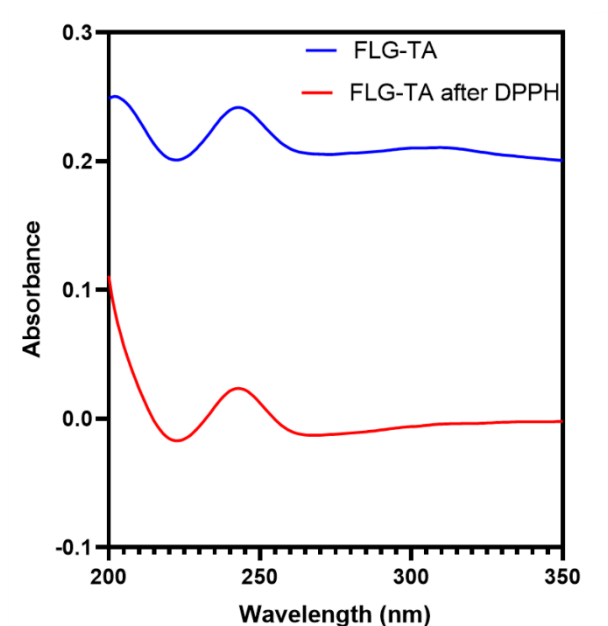

**Figure S5:** UV-visible absorption spectra of FLG-TA films before and after exposure to DPPH radical solution ( $10^{-4}$  M, 30 min incubation), demonstrating changes in material stability under oxidative conditions.

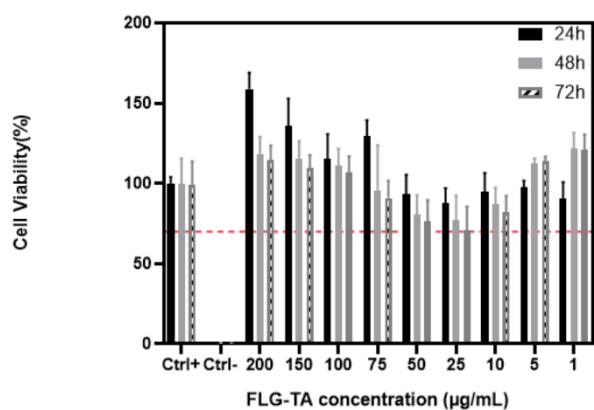

**Figure S6:** Cell viability assessment of PDL cells exposed to FLG-TA. Alamar Blue assay was performed at 24, 48, and 72 h timepoints. Data are presented as mean  $\pm$  SD ( $n = 3$ ), normalized to positive control.

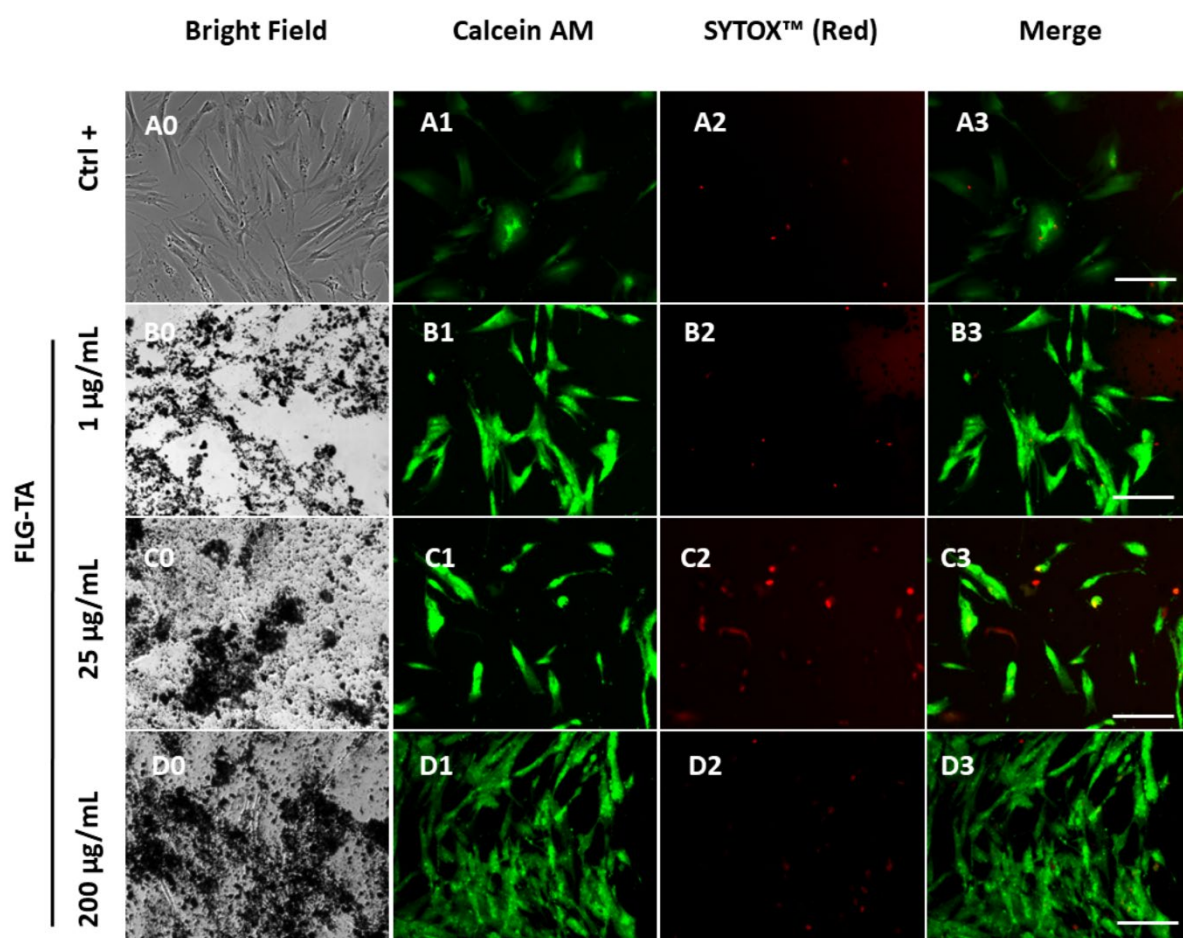

**Figure S7:** Representative fluorescence microscopy images showing cell viability assessment using LIVE/DEAD assay. Live cells exhibit green fluorescence (Calcein AM, ex/em: 495/515 nm) while dead cells show deep red fluorescence (SYTOX™ Deep Red, ex/em: 660/682 nm). Scale bar: 60 µm.



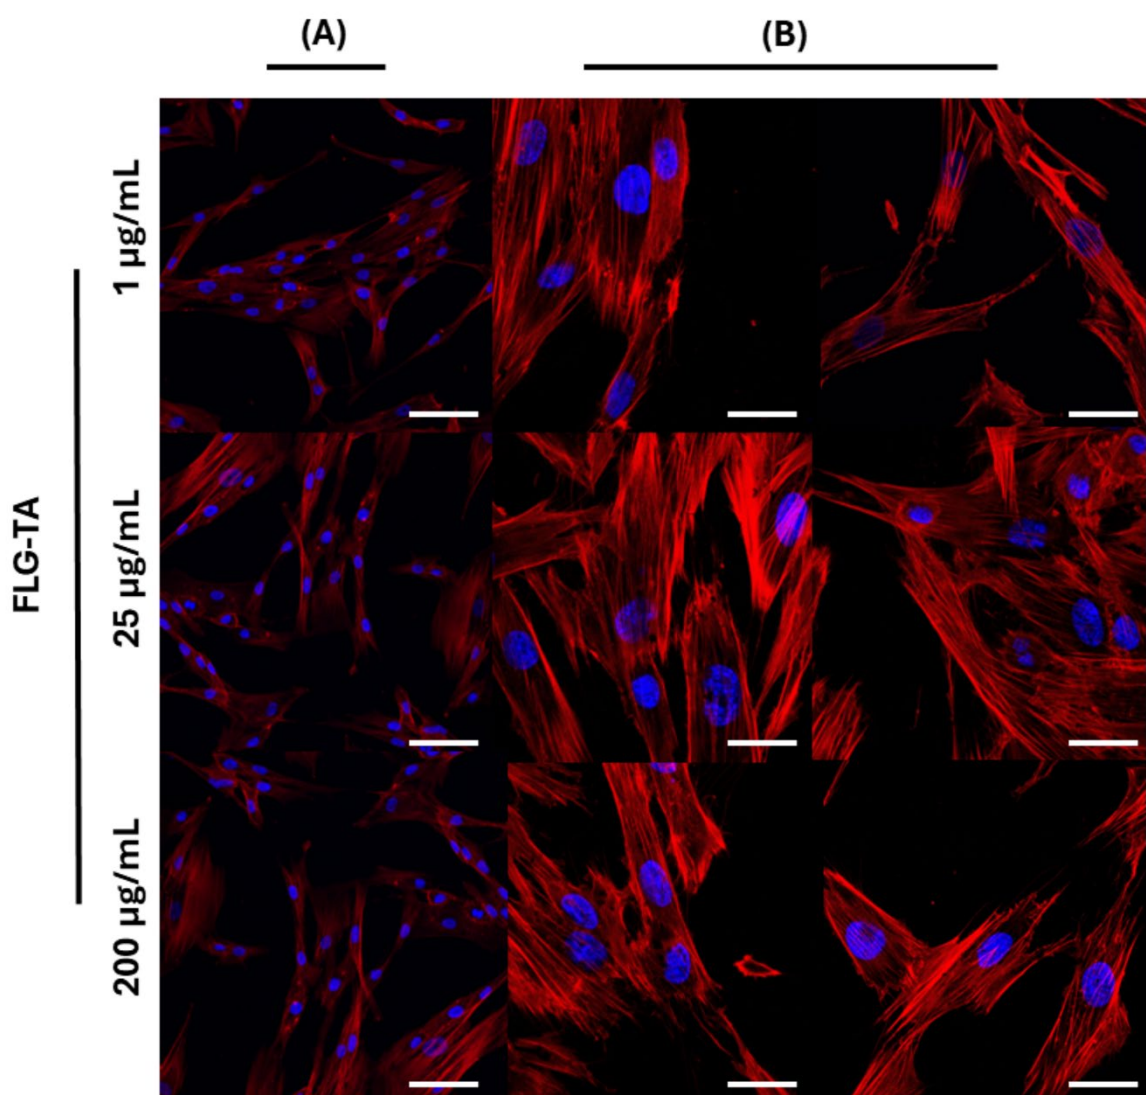

**Figure S8:** Additional representative merged confocal images of PDL cells exposed to FLG-TA at 1, 25, and 200  $\mu\text{g}\cdot\text{mL}^{-1}$ , showing phalloidin-stained F-actin (red) and Hoechst 33258-stained DNA (blue). (A) Low magnification, scale bar: 60  $\mu\text{m}$  and (B) higher magnification, scale bar: 20  $\mu\text{m}$ .

**Table S1:** XPS data of graphite and FLG–TA including the contribution of different carbon moieties obtained by deconvolution of C 1s, and O-to-C ratio obtained from the area of O 1s and C 1s peaks.

| Sample   | XPS analysis (atom %) |              |      |      |                 | O 1s/C 1s |
|----------|-----------------------|--------------|------|------|-----------------|-----------|
|          | C–C, C=C              | C–OR/defects | C=O  | COOR | $\pi$ – $\pi^*$ |           |
| Graphite | 80.98                 | 7.31         | 4.74 | 3.32 | 3.66            | 0.17      |
| FLG–TA   | 73.06                 | 13.06        | 5.94 | 3.75 | 4.06            | 0.45      |
